# Supplementary material
Source: HighWire-hosted journal article supplement (doi:10.1101/rna.076380.120)
Supplement: Supplemental_Material.docx [file Supplemental_Material.docx]

**Supplemental Figure 1.** Sanger sequencing chromatograms of the indicated individuals demonstrating that the children (II:1, II:2 and II:3) are heterozygous for the c. 587C>T and c. 820 C>T variants in the *ADAT3* gene.

**Supplemental Figure 2**. Location of the ADAT3 variants in the protein sequence and expression of the Q274* variant. A) Sequence alignments of ADAT3 homologs with location of alanine 196 and glutamine 274 in the human sequence. B) RT-PCR cDNA chromatograms showing the detection of the c. 820C>T; p. Q274* variant.

**Supplemental Table 1.** Clinical features of the three siblings presented in this study and previously reported cases with variants detected in *ADAT3*.

**Supplemental Information**

Clinical Evaluation of Patients with novel ADAT3 variants.

The boy (II:1) is currently growing at -3 standard deviations (SD) in height and weight. Occipitofrontal circumference (OFC) is within the normal range. He was delivered by caesarean section at 38 weeks of gestation. Birth weight and length were normal (2940 g/ 46 cm). A tetralogy of Fallot and ventricular septal defect were detected and corrected by surgery. He had feeding difficulties in infancy and his development was delayed. In addition to dysmorphic features common for all siblings he had hypertelorism, anisocoria and a high nasal bridge. Sleep disturbances were noted from 2 months of age. His psychomotor development was at the level of ~5 months at the age of 1.5 years. He was sitting independently at 1.5 years of age, but had no fall protection reflex, and started walking at age 5 years, however, balance is bad and gait ataxic. He also has a slight hypotonia, especially in the upper limbs, and no forceps grip. He often suffers from upper respiratory tract infections and asthma; IgA deficiency was diagnosed at 6 years of age. Brain MRI at age 2 years was normal, but at age 9 years it showed a symmetric increase of signal intensity around hippocampus, most likely compatible with a mesial sclerosis.

The oldest sister (II:2) was also delivered by caesarean section at pregnancy week 37. Birth weight and length were normal (2965 g/ 47 cm) and OFC + 1 SD. Her growth parameters at age 8 years are: height -2.5 SD, weight -1 SD and head circumference +1 SD. A delayed psychomotor development was noted at 6 months. She was sitting independently at 1.5 years of age and started walking at age 6 years. Gait is still unstable and ataxic, and she can only walk short distances. At age 1 year and 8 months she was diagnosed with spasticity of the lower limbs with lively reflexes and negative Babinsky sign. At age 2.5 years she presented with primary focal and secondary generalized seizures, and subsequently with absence seizures from age 3 years. She had spasticity of lower limbs from 1 year 8 months. She suffers from recurrent upper respiratory infections of upper respiratory tract and IgA deficiency was diagnosed at age of 2 years. Apart from the symptoms shared by the siblings she also has hypotonia a high and broad forehead, and hypertelorism. MRI findings include white matter abnormalities, wide ventricles and an arachnoidal cyst.

The youngest sibling (II:3) was born at 38+4 weeks gestation. Birth weight/length/OFC were -1 SD/-0.5SD /-1SD. A heart murmur was noticed, and ultrasound of the heart showed a ventricular septal defect and a patent ductus arteriosus, which closed spontaneously over time. Due to a metopic craniosynostosis, ultrasound of the brain was performed with normal result. As she had feeding difficulties, she received a percutaneous endoscopic gastrostomy at age 2 years. She now has problems with vomiting and constipation. She sat independently at age 2 years. She cannot walk and has spasticity in her lower limbs. The following dysmorphic features were also noticed; microcephaly (-2 SD), epicanthus, high nasal bridge and a high palate. At 3.5 years of age her height was -2 SD and weight +/- 0 SD. Like her older siblings she also has IgA deficiency.
